# Supplementary material for: Facile fabrication of a large-area and cost-effective PDMS-SERS substrate by sandpaper template-assisted lithography
Source: Royal Society of Chemistry journal article supplement (doi:10.1039/c9ay01494b), 2019-01-01
Supplement: c9ay01494b1.pdf [file c9ay01494b1.pdf]

## Supplementary Information

### Facile fabrication of large-area and cost-effective PDMS-SERS substrate by sandpaper template-assisted lithography

Ji Sun<sup>a</sup>, Lin Gong<sup>a</sup>, Zhengjun Gong<sup>a</sup>, Dongmei Wang<sup>a</sup>, Xiaosi Yin<sup>a</sup>, Meikun Fan<sup>a,b,\*</sup>

<sup>a</sup> Faculty of Geosciences and Environmental Engineering, Southwest Jiaotong University, Chengdu, 610031, China

<sup>b</sup> State-province Joint Engineering Laboratory of Spatial Information Technology of High-Speed Rail Safety, Chengdu, 610031, China.

\* Corresponding author: [meikunfan@gmail.com](mailto:meikunfan@gmail.com)

Table S1. Different curing time corresponding to the tensile displacement and tensile strength

| Curing time/h | Displacement/mm | tensile strength /MPa |
|---------------|-----------------|-----------------------|
| 6             | 38.32           | 0.52±0.04             |
| 9             | 50.07           | 0.93±0.02             |
| 12            | 58.60           | 0.94±0.02             |
| 15            | 52.01           | 1.16±0.03             |
| 18            | 54.18           | 1.78±0.03             |

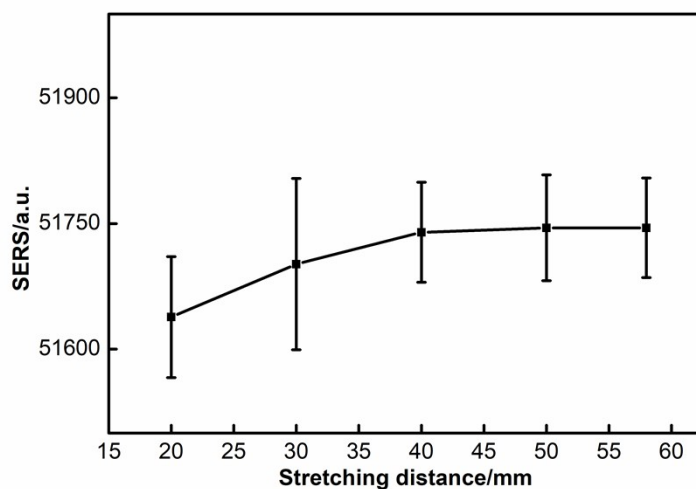

**Fig. S1** SERS performance after the length of the SMPS substrate was stretched from 20 mm to different lengths (30mm, 40mm, 50mm, 58mm). 20  $\mu$ L R6G (100 nM) was used as the SERS probe Laser power: 10 mW. Integration time: 10 s. Objective: 50 $\times$ .

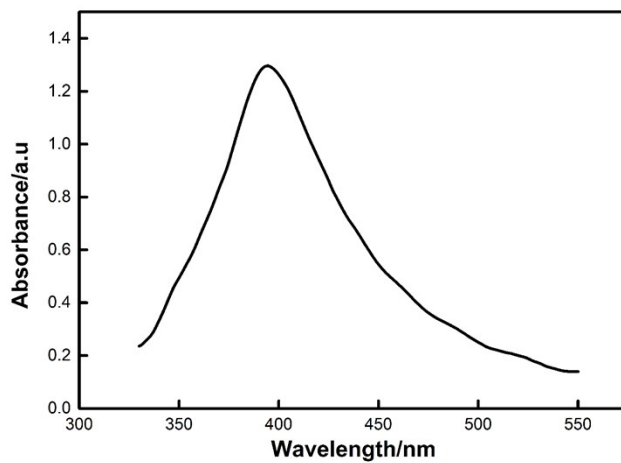

**Fig. S2** UV-Vis spectra of the prepared Ag NPs.

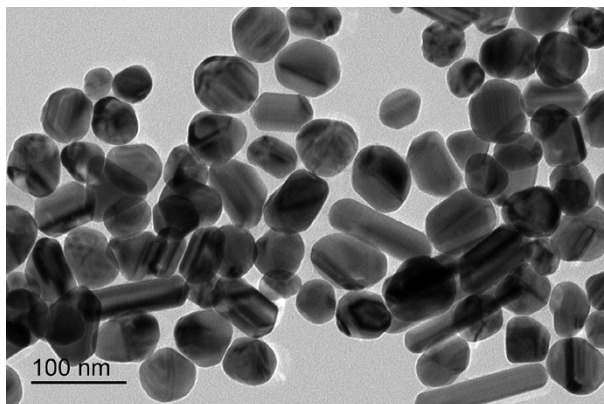

**Fig. S3** TEM image of the prepared Ag NPs.

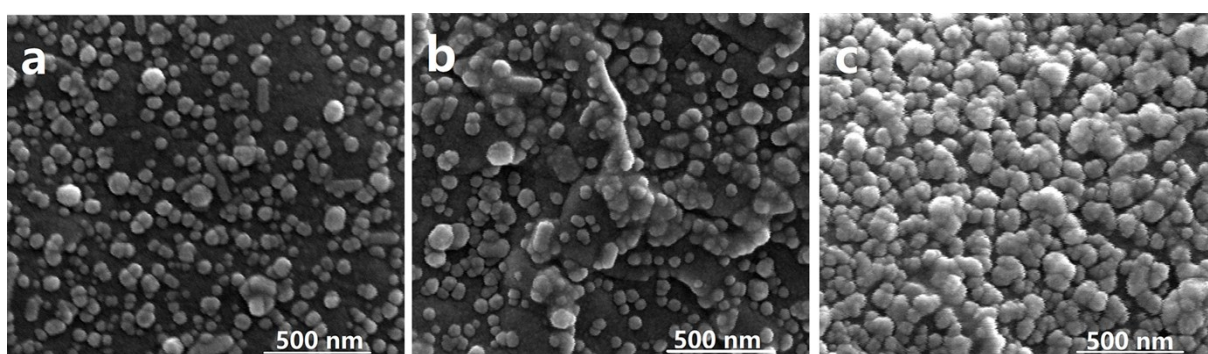

**Fig. S4** SEM images of different rounds of Ag NPs deposited on the SMPS substrate. a-c represented one, two and three rounds of Ag NPs deposition, respectively.

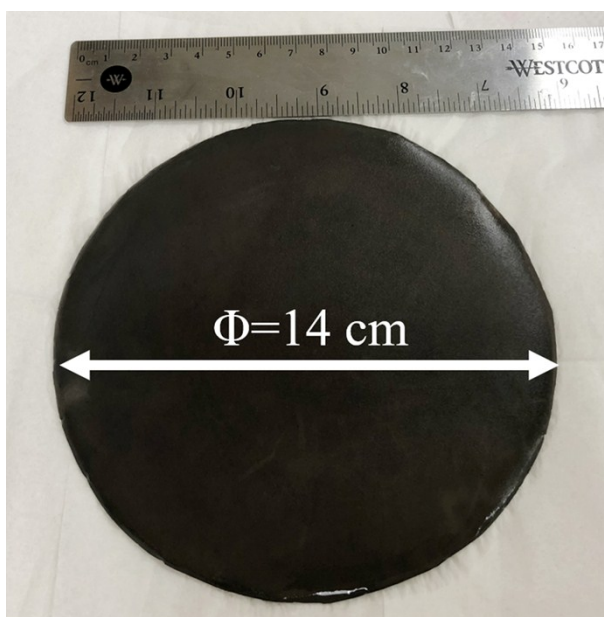

**Fig. S5** Photos of Statistic of the circular structure SMPS substrates with 14 cm diameter.
